# Supplementary material for: Complete conversion of lignocellulosic biomass to mixed organic acids and ethylene glycol via cascade steps
Source: Royal Society of Chemistry journal article supplement (doi:10.1039/d1gc00060h), 2021-01-01
Supplement: d1gc00060h1.pdf [file d1gc00060h1.pdf]

## Supporting Information

### **Complete conversion of lignocellulosic biomass to mixed organic acids and ethylene glycol via cascade steps**

Jifeng Pang,<sup>a</sup> Bo Zhang,<sup>a</sup> Yu Jiang,<sup>a</sup> Yu Zhao,<sup>a</sup> Changzhi Li,<sup>\*a</sup> Mingyuan Zheng,<sup>\*a,b</sup>  
Tao Zhang<sup>a,c</sup>

<sup>a</sup> CAS Key Laboratory of Science and Technology on Applied Catalysis, Dalian Institute of Chemical Physics, Chinese Academy of Sciences, Dalian 116023, China

<sup>b</sup> Dalian National Laboratory for Clean Energy, Chinese Academy of Sciences, China

<sup>c</sup> State Key Laboratory of Catalysis, Dalian Institute of Chemical Physics, Chinese Academy of Sciences, Dalian 116023, China

E-mail: [licz@dicp.ac.cn](mailto:licz@dicp.ac.cn) (C.Z. Li); [myzheng@dicp.ac.cn](mailto:myzheng@dicp.ac.cn) (M.Y. Zheng)

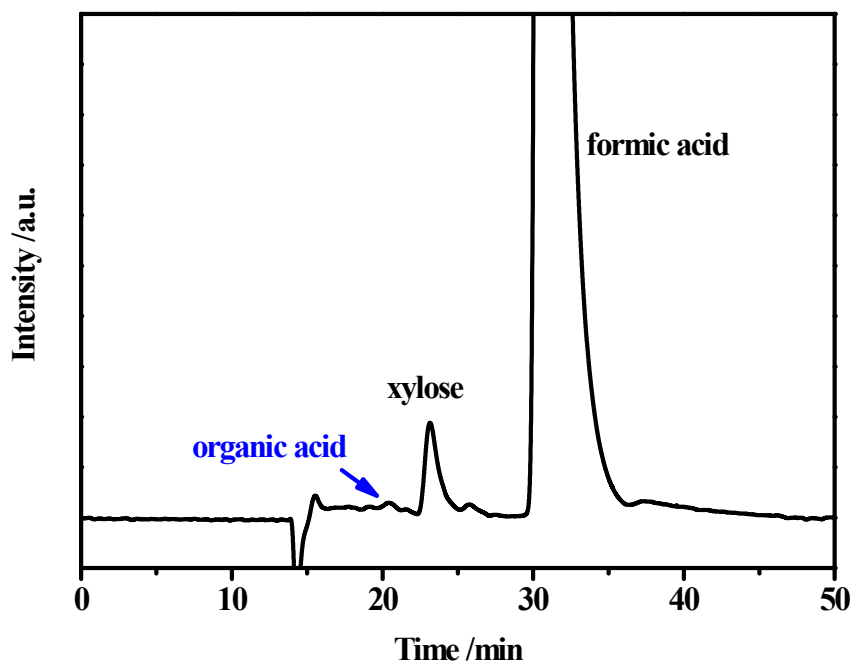

**Fig. S1** The HPLC profile of liquid products diluted with water.

**Table S1** Effect of H<sub>2</sub>O<sub>2</sub> amounts on lignin conversion<sup>a</sup>

| Amount of H <sub>2</sub> O <sub>2</sub> /% | Yield /% (Based on NPOC) <sup>b</sup> |
|--------------------------------------------|---------------------------------------|
| 0                                          | 40.6                                  |
| 2                                          | 57.3                                  |
| 4                                          | 86.7                                  |
| 8                                          | 95.0                                  |

<sup>a</sup> reaction conditions: 0.2 g lignin, 10 mL formic acid and certain amounts of 30% H<sub>2</sub>O<sub>2</sub>, 353 K; <sup>b</sup> after reaction, the solid was filtered and the formic acid was removed by the evaporation method for total organic carbon measurement.

**Table S2** Conversion of lignin in the solvent of acetic acid.<sup>a</sup>

| H <sub>2</sub> O <sub>2</sub> amount/ mL | conversion /% | formic acid yield /% |
|------------------------------------------|---------------|----------------------|
|------------------------------------------|---------------|----------------------|

|     |     |      |
|-----|-----|------|
| 0.5 | 100 | 0.42 |
| 1   | 100 | 0.56 |
| 2   | 100 | 0.61 |

<sup>a</sup> 0.2 g lignin, 10 mL formic acid and certain amounts of 30% H<sub>2</sub>O<sub>2</sub> at 353 K.

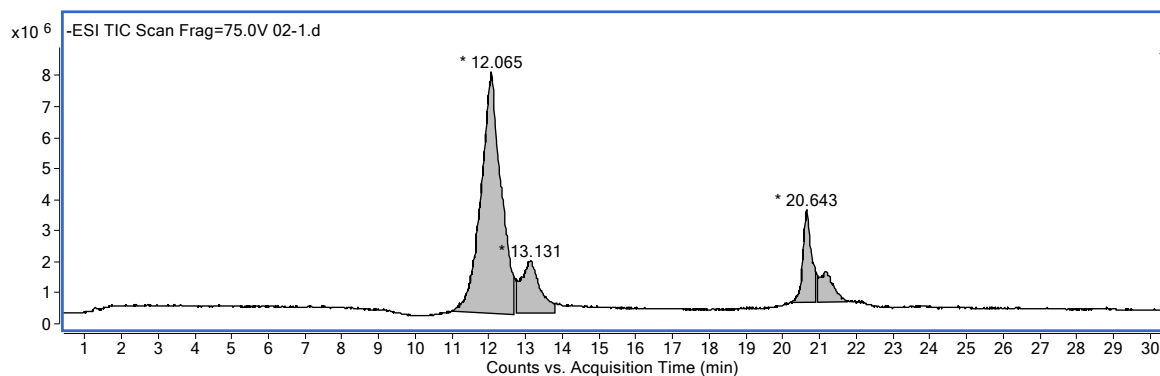

**Fig. S2** The HPLC-MS profile of lignin conversion products.

**Table S3** Lignin conversion products in Figure S2

| <b>Peak at 12.065 min</b> |             |             |                 |                    |              |
|---------------------------|-------------|-------------|-----------------|--------------------|--------------|
| <b>Formula</b>            | <b>Best</b> | <b>Mass</b> | <b>Tgt Mass</b> | <b>Ion Species</b> | <b>Score</b> |
| C3H4O2                    | TRUE        | 72.0212     | 72.0211         | C3H3O2             | 97.96        |
| C3H4O4                    | TRUE        | 104.0108    | 104.011         | C3H3O4             | 87.54        |
| C4H4O4                    | TRUE        | 116.0109    | 116.011         | C4H3O4             | 99.84        |
| C5H6O4                    | TRUE        | 130.0264    | 130.0266        | C5H5O4             | 95.56        |
| C6H6O4                    | TRUE        | 142.0263    | 142.0266        | C6H5O4             | 99.4         |
| C5H6O5                    | TRUE        | 146.0213    | 146.0215        | C5H5O5             | 99.21        |
| C7H6O6                    | TRUE        | 186.0163    | 186.0164        | C7H5O6             | 95.85        |
| <b>Peak at 13.131 min</b> |             |             |                 |                    |              |
| C3H6O3                    | TRUE        | 90.0317     | 90.0317         | C3H5O3             | 87.87        |
| C4H6O4                    | TRUE        | 118.0265    | 118.0266        | C4H5O4             | 99.73        |
| C4H8O3                    | TRUE        | 104.0472    | 104.0473        | C4H7O3             | 87.64        |

|                           |      |          |          |          |       |
|---------------------------|------|----------|----------|----------|-------|
| C4H6O5                    | TRUE | 134.0215 | 134.0215 | C4H5O5   | 99.99 |
| C5H8O5                    | TRUE | 148.0373 | 148.0372 | C5H7O5   | 95.38 |
| C8H10O6                   | TRUE | 202.0482 | 202.0477 | C8H9O6   | 98.96 |
| C9H12O6                   | TRUE | 216.0639 | 216.0634 | C9H11O6  | 84.91 |
| C6H8O4                    | TRUE | 144.0421 | 144.0423 | C6H7O4   | 97.57 |
| C7H8O4                    | TRUE | 156.0423 | 156.0423 | C7H7O4   | 89.75 |
| C7H10O4                   | TRUE | 158.058  | 158.0579 | C7H9O4   | 96.86 |
| C6H8O6                    | TRUE | 176.0322 | 176.0321 | C6H7O6   | 93.09 |
| <b>Peak at 20.643 min</b> |      |          |          |          |       |
| C5H10O4                   | TRUE | 134.0578 | 134.0579 | C5H9O4   | 97.73 |
| C5H8O4                    | TRUE | 132.0421 | 132.0423 | C5H7O4   | 87.6  |
| C5H6O4                    | TRUE | 130.0265 | 130.0266 | C5H5O4   | 99.75 |
| C6H8O4                    | TRUE | 144.0423 | 144.0423 | C6H7O4   | 81.55 |
| C5H10O5                   | TRUE | 150.0528 | 150.0528 | C5H9O5   | 76.47 |
| C6H10O6                   | TRUE | 178.0479 | 178.0477 | C6H9O6   | 89.78 |
| C6H12O6                   | TRUE | 180.0636 | 180.0634 | C6H11O6  | 85.43 |
| C4H8O4                    | TRUE | 120.0422 | 120.0423 | C4H7O4   | 87.68 |
| C4H6O4                    | TRUE | 118.0265 | 118.0266 | C4H5O4   | 87.59 |
| C5H6O3                    | TRUE | 114.0315 | 114.0317 | C5H5O3   | 99.69 |
| <b>Peak at 21.358 min</b> |      |          |          |          |       |
| C9H12O5                   | TRUE | 200.0689 | 200.0685 | C9H11O5  | 82.27 |
| C12H12O7                  | TRUE | 268.0595 | 268.0583 | C12H11O7 | 85.36 |
| C13H14O9                  | TRUE | 314.0635 | 314.0638 | C13H13O9 | 89.45 |
| C13H14O8                  | TRUE | 298.0703 | 298.0689 | C13H13O8 | 89.97 |
| C8H12O3                   | TRUE | 156.0786 | 156.0786 | C8H11O3  | 99.78 |
| C6H6O4                    | TRUE | 142.0265 | 142.0266 | C6H5O4   | 87.22 |
| C5H4O4                    | TRUE | 128.0109 | 128.011  | C5H3O4   | 87.01 |
| C5H10O3                   | TRUE | 118.0629 | 118.063  | C5H9O3   | 87.68 |
| C4H8O3                    | TRUE | 104.0472 | 104.0473 | C4H7O3   | 87.35 |

|        |      |        |         |        |       |
|--------|------|--------|---------|--------|-------|
| C5H4O2 | TRUE | 96.021 | 96.0211 | C5H3O2 | 93.43 |
|--------|------|--------|---------|--------|-------|

**Table S4** The chemical structure of typical products in Figure 3 (A)<sup>a</sup>

| Code | m/z (1- )   | Formula(- H) | structure                                                                           | CAS#                   | Name                                                      |
|------|-------------|--------------|-------------------------------------------------------------------------------------|------------------------|-----------------------------------------------------------|
| 1-1  | 88.988      | C2H1O2       | 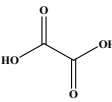   | 144-62-7               | Oxalic acid                                               |
| 1-2  | 133.01<br>4 | C4H5O5       |    | 97-67-6                | Malic Acid                                                |
| 1-3  | 175.12<br>4 | C6H7O6       |    | 99-14-9                | Tricarballic acid                                         |
| 1-4  | 185.00<br>9 | C7H5O6       |   | 5280494 <sup>b</sup>   | 3-maleylpyruvic acid                                      |
| 1-5  | 215.02<br>0 | C8H7O7       |  | 21864724 <sup>c</sup>  | (2Z,4E)-5-Hydroxy-2,4-pentadiene-1,2,5-tricarboxylic acid |
| 1-6  | 227.02<br>0 | C9H7O7       |  | 36362-97-7             | 1,2,3-Benzenetricarboxylic acid hydrate                   |
| 1-7  | 242.07<br>5 | C8H3O9       |  | 20416-04-0             | Furantetracarboxylic acid                                 |
| 1-8  | 277.02<br>0 | C9H9O10      |  | 129677010 <sup>b</sup> | Epoxytriglyceride                                         |
| 1-9  | 303.03<br>6 | C16H16O6     |  | 47610 <sup>b</sup>     | 3-O-Methylcatechin                                        |

<sup>a</sup> the structure of all compounds are determined by the m/z with the deviation of <0.01; <sup>b</sup> the number indicates the PubChem CID; <sup>c</sup> the number indicates the ChemSpider ID.

**Table S5** The chemical structure of typical products in Figure 3 (B)

| Code | Time | Formula(-H)                                   | structure                                                                           | CAS#       | Name                                  |
|------|------|-----------------------------------------------|-------------------------------------------------------------------------------------|------------|---------------------------------------|
| 2-1  | 4.7  | C <sub>6</sub> H <sub>10</sub> O <sub>4</sub> | 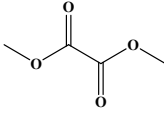   | 95-92-1    | Diethyl oxalate                       |
| 2-2  | 5.4  | C <sub>5</sub> H <sub>10</sub> O <sub>4</sub> |    | 89-91-8    | Methyl dimethoxyacetate               |
| 2-3  | 6.9  | C <sub>5</sub> H <sub>8</sub> O <sub>4</sub>  |    | 108-59-8   | Dimethyl malonate                     |
| 2-4  | 8.8  | C <sub>6</sub> H <sub>8</sub> O <sub>4</sub>  |    | 624-49-7   | Dimethyl fumarate                     |
| 2-5  | 9.0  | C <sub>6</sub> H <sub>10</sub> O <sub>4</sub> |   | 106-65-0   | dimethyl succinate                    |
| 2-6  | 9.1  | C <sub>7</sub> H <sub>12</sub> O <sub>4</sub> |  | 1604-11-1  | Dimethyl methylsuccinate              |
| 2-7  | 9.6  | C <sub>7</sub> H <sub>10</sub> O <sub>4</sub> |  | 617-54-9   | Dimethyl citraconate                  |
| 2-8  | 10.2 | C <sub>6</sub> H <sub>12</sub> O <sub>3</sub> |  | 5436-21-5  | 4,4-Dimethoxy-2-butanone              |
| 2-9  | 13.6 | C <sub>8</sub> H <sub>12</sub> O <sub>6</sub> |  | 40967-67-7 | Trimethyl ethane-1,1,2-tricarboxylate |
| 2-10 | 14.7 | C <sub>7</sub> H <sub>10</sub> O <sub>5</sub> |  | 264-564-1  | Dimethyl 2-methyl-3-oxosuccinate      |
| 2-11 | 15.8 | C <sub>9</sub> H <sub>12</sub> O <sub>6</sub> |  | 20820-77-3 | Trimethyl aconitate                   |

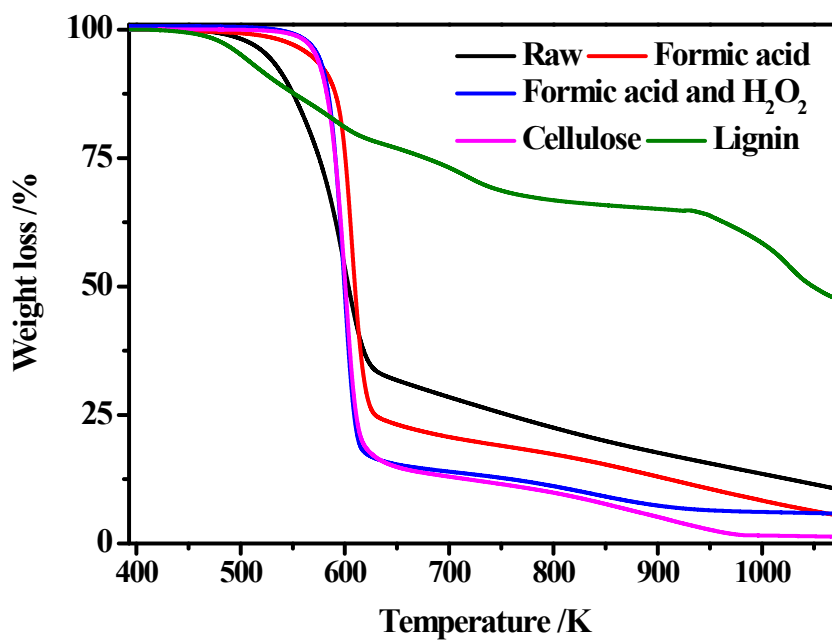

Fig. S3 TG curves of the raw and pretreated Miscanthus.

Table S6 Product distributions after the transformation of different biomass.

| Feedstock <sup>a</sup> | Initial weight /g | Hemicellulose and lignin derived products /g |        | Cellulose derived products /g <sup>b</sup> |        |        | Weight balance /% |
|------------------------|-------------------|----------------------------------------------|--------|--------------------------------------------|--------|--------|-------------------|
|                        |                   | maleic acid                                  | others | EG                                         | 1,2-PG | others |                   |
|                        |                   | Birch wood                                   | 10     | 0.84                                       | 3.3    | 3.8    |                   |
| Miscanthus             | 10                | 0.90                                         | 4.1    | 3.2                                        | 0.23   | 1.4    | 98.3              |
| Corn stalk             | 10                | 0.76                                         | 4.7    | 2.6                                        | 0.22   | 1.5    | 97.8              |

<sup>a</sup> Corn stalk was washed with water to remove the water-soluble compounds; <sup>b</sup> others was calculated

by the equation: Weight of cellulosic biomass = Sum of weights of EG, 1,2-PG and others.
